# Supplementary material for: The Impact of Customer Community Participation on Customer Behaviors: An Empirical Investigation
Source: Atypon-hosted journal article supplement (doi:10.1287/mksc.1090.0555), 2010-03-11
Supplement: mksc.1090.0555-sm-online_supplement.pdf [file mksc.1090.0555-sm-online_supplement.pdf]

## Online Supplement

To accompany the following manuscript,

**The Impact of Customer Community Participation on Customer Behaviors: An Empirical Investigation**

### CONTENTS

| <i>Topic</i>                                                                                        | <i>Pages</i>   |
|-----------------------------------------------------------------------------------------------------|----------------|
| <b>I. The “Participation Model”</b><br>a) <i>Probit Model</i><br>b) <i>Linear Probability Model</i> | <b>2 – 3</b>   |
| <b>II. The “Outcome Model”</b>                                                                      | <b>4</b>       |
| <b>III. The set of Full Conditional distributions</b>                                               | <b>5 – 11</b>  |
| <b>IV. Description of the Data Augmentation process</b>                                             | <b>12 – 15</b> |

## I The Participation Model

### a) Probit Model

The “Probit Model for Participation” is specified by equations (1) thru (3) in the manuscript (*Section 4.1*). These equations are reproduced below<sup>1</sup>,

$$P_h^* \sim \text{Normal}[\rho_h, 1] \quad (1)$$

$$\begin{aligned} P_h &= 1 && \text{if } P_h^* > 0 \\ P_h &= 0 && \text{if } P_h^* \leq 0 \end{aligned} \quad (2)$$

$$\rho_h = \rho_0 + \rho_1 \text{German}_h + \rho_2 \text{Age}_h + \rho_3 \text{Gender}_h + \rho_4 \text{Memlength}_h + \rho_5 \text{PosFB}_h + \rho_6 \text{NegFB}_h + \rho_7 \text{Invite}_h \quad (3)$$

where  $P_h^*$  is a latent participation variable for customer  $h$ , and  $P_h$  is a dummy variable which equals 1 if the customer participated in the community in the time period  $T_2$ , else it equals 0. This leads to a "Probit" model of choice.

In these set of equations (1 thru 3) we need to set our priors over the parameters  $\rho_0$  thru  $\rho_7$ . We specify a prior distribution of  $\text{Normal}(0,100)$  over all these parameters.

### b) Linear Probability Model

The Linear Probability Model is specified by equations (A3.1) and (A3.2) in *Appendix 3* of the manuscript. These are reproduced below,

$$P_h \sim \text{Normal}[\text{Propen}_h, \xi^2] \quad (\text{A3.1})$$

---

<sup>1</sup> We maintain the same numbering for the equations as used in the manuscript.

$$Propen_h = \eta_0 + \eta_1 German_h + \eta_2 Age_h + \eta_3 Gender_h + \eta_4 Memlength_h + \eta_5 PosFB_h + \eta_6 NegFB_h + \eta_7 Invite_h \quad (A3.2)$$

$P_h$  is a dummy variable which equals 1 if the customer participated in the community during time period  $T_2$ , else it equals 0. Further, we interpret  $Propen_h$  as the propensity to participate in a community for customer  $h$ .

## II The Outcome Model

The ‘‘Outcome Model’’ is a multivariate tobit type I model and is specified by equations 4a thru 6 in the manuscript (*Section 4.2*). These equations are reproduced below,

$$\text{Define a latent outcome vector } \mathbf{Outcome}_{ht}^* = \begin{pmatrix} Bids_{ht}^* \\ Listings_{ht}^* \\ Amnt_{ht}^* \\ Revenue_{ht}^* \end{pmatrix} \text{ such that,}$$

$$\begin{aligned} Bids_{ht} &= 0 \quad \text{if } Bids_{ht}^* \leq 0 \\ Bids_{ht} &= Bids_{ht}^* \quad \text{if } Bids_{ht}^* > 0 \end{aligned} \quad (4a)$$

$$\begin{aligned} Listings_{ht} &= 0 \quad \text{if } Listings_{ht}^* \leq 0 \\ Listings_{ht} &= Listings_{ht}^* \quad \text{if } Listings_{ht}^* > 0 \end{aligned} \quad (4b)$$

$$\begin{aligned} Amnt_{ht} &= 0 \quad \text{if } Amnt_{ht}^* \leq 0 \\ Amnt_{ht} &= Amnt_{ht}^* \quad \text{if } Amnt_{ht}^* > 0 \end{aligned} \quad (4c)$$

$$\begin{aligned} Revenue_{ht} &= 0 \quad \text{if } Revenue_{ht}^* \leq 0 \\ Revenue_{ht} &= Revenue_{ht}^* \quad \text{if } Revenue_{ht}^* > 0 \end{aligned} \quad (4d)$$

$$\text{Further, } \mathbf{Outcome}_{ht}^* \sim MVNormal(\boldsymbol{\beta}_{ht}, \boldsymbol{\Sigma}) \quad (5)$$

$$\text{where } \boldsymbol{\beta}_{ht} = \boldsymbol{\beta}_0 + \boldsymbol{\beta}_1 Propen_h + \boldsymbol{\beta}_2 T_{2t} + \boldsymbol{\beta}_3 T_{3t} + \boldsymbol{\beta}_4 T_{4t} + \boldsymbol{\beta}_5 German_h + \boldsymbol{\beta}_6 Age_h + \boldsymbol{\beta}_7 Gender_h + \boldsymbol{\beta}_8 PosFB_h + \boldsymbol{\beta}_9 NegFB_h + \boldsymbol{\beta}_{10} Memlength_h \quad (6a)$$

and  $\boldsymbol{\Sigma}$  is a 4x4 variance-covariance matrix.

The priors used to estimate the various parameters in equations 4a thru 6a are provided in *Appendix 2* of the manuscript.

### III The set of Full Conditional distributions

The two models (the ‘‘Participation’’ and the ‘‘Outcome’’ model) are estimated together by setting up an MCMC sampler involving a data augmentation process. In each iteration, the sampler samples thru the following set of full conditional distributions<sup>2</sup>.

#### *The Participation Model:*

##### a) Probit Model of Participation

###### 1a.1 Draw $\rho_0$

$$\begin{aligned} \Pi[\rho_0 / \dots\dots\dots] &\propto \mathbf{Probit\ likelihood\ x\ Normal\ prior} \\ &\propto \left[ \prod_{h=1}^N \left\{ \Phi(P_h^* = 0) \right\}^{1-P_h} \left\{ 1 - \Phi(P_h^* = 0) \right\}^{P_h} \right] \frac{1}{\sqrt{2\pi*100}} e^{-\frac{1}{2*100}(\rho_0 - 0)^2} \end{aligned}$$

$$\log \Pi[\rho_0 / \dots\dots\dots] \propto \sum_{h=1}^N (1 - P_h) \log \left\{ \Phi(P_h^* = 0) \right\} + \sum_{h=1}^N P_h \log \left\{ 1 - \Phi(P_h^* = 0) \right\} - \frac{1}{2*100} (\rho_0 - 0)^2$$

where,

$$P_h = 1 \quad \text{if } P_h^* > 0 \quad \text{else it is } = 0$$

$$P_h^* \sim \text{Normal}[\rho_h, 1]$$

$$\begin{aligned} \rho_h = &\rho_0 + \rho_1 \text{German}_h + \rho_2 \text{Age}_h + \rho_3 \text{Gender}_h + \rho_4 \text{Memlength}_h + \rho_5 \text{PosFB}_h \\ &+ \rho_6 \text{NegFBr}_h + \rho_7 \text{Invite}_h \end{aligned}$$

###### 1a.2 Draw $\rho_1$

$$\Pi[\rho_1 / \dots\dots\dots] \propto \mathbf{Probit\ likelihood\ x\ Normal\ prior}$$

---

<sup>2</sup> Many of the conditional distributions in the sampler are from non-conjugate distributions. We employ a random walk Metropolis Hastings algorithm to obtain draws from these distributions.

$$\propto \left[ \prod_{h=1}^N \{\Phi(P_h^* = 0)\}^{1-P_h} \{1 - \Phi(P_h^* = 0)\}^{P_h} \right] \frac{1}{\sqrt{2\pi*100}} e^{-\frac{1}{2*100}(\rho_1 - 0)^2}$$

$$\log \Pi[\rho_1 / \dots\dots\dots] \propto \sum_{h=1}^N (1 - P_h) \log\{\Phi(P_h^* = 0)\} + \sum_{h=1}^N P_h \log\{1 - \Phi(P_h^* = 0)\} - \frac{1}{2*100} (\rho_1 - 0)^2$$

where,

$$P_h = 1 \quad \text{if } P_h^* > 0 \quad \text{else it is } = 0$$

$$P_h^* \sim \text{Normal}[\rho_h, 1]$$

$$\begin{aligned} \rho_h = & \rho_0 + \rho_1 \text{German}_h + \rho_2 \text{Age}_h + \rho_3 \text{Gender}_h + \rho_4 \text{Memlength}_h + \rho_5 \text{PosFB}_h \\ & + \rho_6 \text{NegFBr}_h + \rho_7 \text{Invite}_h \end{aligned}$$

**1a.3** }  
**1a.4** } Draw  $\rho_2, \rho_3, \rho_4, \rho_5, \rho_6,$  and  $\rho_7$  respectively, similarly as per step 1a.2  
**1a.5** }  
**1a.6** }  
**1a.7** }  
**1a.8** }

b) Linear Probability Model

**1b.1** Draw  $\eta_0$

$$\Pi[\eta_0 / \dots\dots\dots] \propto \text{Normal likelihood} \times \text{Normal prior}$$

$$\propto \left[ \prod_{h=1}^N \frac{1}{\sqrt{2\pi\zeta^2}} e^{-\frac{1}{2\zeta^2}(P_h - \text{Propen}_h)^2} \right] \frac{1}{\sqrt{2\pi*100}} e^{-\frac{1}{2*100}(\eta_0 - 0)^2}$$

$\propto$  Normal (Mean, Variance)

where,

$$\text{Mean} = \frac{\left\{ \frac{\sum_{h=1}^N (P_h - zz_h)}{\xi^2} + \frac{0}{100} \right\}}{\left\{ \frac{N}{\xi^2} + \frac{1}{100} \right\}} \quad \text{and} \quad \text{Variance} = \frac{N}{\xi^2} + \frac{1}{100}$$

In the above expressions  $zz_h = Propen_h - \eta_0$ ,  $P_h$  is a dummy variable for participation and

$$Propen_h = \eta_0 + \eta_1 German_h + \eta_2 Age_h + \eta_3 Gender_h + \eta_4 Memlength_h + \eta_5 PosFB_h + \eta_6 NegFB_h + \eta_7 Invite_h$$

## 1b.2 Draw $\eta_1$

$\Pi[\eta_1 / \dots\dots\dots]$   $\propto$  **Normal likelihood**  $\times$  **Normal prior**

$$\propto \left[ \prod_{h=1}^N \frac{1}{\sqrt{2\pi\xi^2}} e^{-\frac{1}{2\xi^2}(P_h - Propen_h)^2} \right] \frac{1}{\sqrt{2\pi*100}} e^{-\frac{1}{2*100}(\eta_1 - 0)^2}$$

$\propto$  Normal (Mean, Variance)

where,

$$\text{Mean} = \frac{\left\{ \frac{\sum_{h=1}^N (P_h - zz_h) German_h}{\xi^2} + \frac{0}{100} \right\}}{\left\{ \frac{\sum_{h=1}^N (German_h)^2}{\xi^2} + \frac{1}{100} \right\}} \quad \text{and} \quad \text{Variance} = \left\{ \frac{\sum_{h=1}^N (German_h)^2}{\xi^2} + \frac{1}{100} \right\}$$

In the above expressions  $zz_h = Propen_h - \eta_1 German_h$ ,  $P_h$  is a dummy variable for participation and

$$Propen_h = \eta_0 + \eta_1 German_h + \eta_2 Age_h + \eta_3 Gender_h + \eta_4 Memlength_h + \eta_5 PosFB_h + \eta_6 NegFB_h + \eta_7 Invite_h$$

1b.3 )  
 1b.4 )  
 1b.5 ) Draw  $\eta_2, \eta_3, \eta_4, \eta_5, \eta_6,$  and  $\eta_7$  respectively, similarly as per step 1b.2  
 1b.6 )  
 1b.7 )  
 1b.8 )

### 1.9 Calculate $Propen_h$

$$Propen_h = \eta_0 + \eta_1 German_h + \eta_2 Age_h + \eta_3 Gender_h + \eta_4 Memlength_h + \eta_5 PosFB_h + \eta_6 NegFB_h + \eta_7 Invite_h$$

### 1.10 Data augmentation step

(-----Data augmentation details are provided at the end of this document-----)

#### *The Outcome Model:*

### 1.11 Draw $\beta_0$

$\Pi[\beta_0 / \dots\dots\dots] \propto$  MVNormal likelihood x MVNormal prior

$$\propto \left[ \prod_{h=1}^N \prod_{t=1}^4 \exp \left\{ -\frac{1}{2} (\mathbf{Outcome}_{ht}^* - \beta_{ht})^T (\Sigma)^{-1} (\mathbf{Outcome}_{ht}^* - \beta_{ht}) \right\} \right] \exp \left\{ -\frac{1}{2} (\beta_0 - \mathbf{0})^T [\mathbf{100I}]^{-1} (\beta_0 - \mathbf{0}) \right\}$$

$\propto$  Normal (Mean, Variance)

where,

$$\mathbf{Mean} = \frac{\mathbf{0} * [\mathbf{100I}]^{-1} + \left\{ \sum_{h=1}^N \sum_{t=1}^4 (\mathbf{Outcome}_{ht}^* - \mathbf{ZZ}_{ht}) \right\} \Sigma^{-1}}{[\mathbf{100I}]^{-1} + Nall \Sigma^{-1}} \quad \text{and} \quad [\mathbf{Variance}]^{-1} = [\mathbf{100I}]^{-1} + Nall \Sigma^{-1}$$

In the above expressions  $\mathbf{ZZ}_{ht} = \beta_{ht} - \beta_0$ ,  $Nall = \sum_{h=1}^N \sum_{t=1}^4 1.0$  and ,

$$\begin{aligned} \beta_{ht} = & \beta_0 + \beta_1 Propen_h + \beta_2 T_2 + \beta_3 T_3 + \beta_4 T_4 + \beta_5 German_h + \beta_6 Age_h + \beta_7 Gender_h \\ & + \beta_8 PosFB_h + \beta_9 NegFB_h + \beta_{10} Memlength_h \end{aligned}$$

### 1.12 Data augmentation step

(-----Data augmentation details are provided at the end of this document-----)

### 1.13 Draw $\beta_1$

$\Pi[\beta_1 / \dots\dots\dots] \propto \text{MVNormal likelihood} \times \text{MVNormal prior}$

$$\propto \left[ \prod_{h=1}^N \prod_{t=1}^4 \exp \left\{ -\frac{1}{2} (\mathbf{Outcome}_{ht}^* - \beta_{ht})^T (\Sigma)^{-1} (\mathbf{Outcome}_{ht}^* - \beta_{ht}) \right\} \right] \exp \left\{ -\frac{1}{2} (\beta_1 - \mathbf{0})^T [\mathbf{100I}]^{-1} (\beta_1 - \mathbf{0}) \right\}$$

$\propto$  Normal (**Mean, Variance**)

where,

$$\mathbf{Mean} = \frac{\mathbf{0} * [\mathbf{100I}]^{-1} + \left\{ \sum_{h=1}^N \sum_{t=1}^4 (\mathbf{Outcome}_{ht}^* - \mathbf{ZZ}_{ht}) \mathbf{Propen}_h \right\} \Sigma^{-1}}{[\mathbf{100I}]^{-1} + \left\{ \sum_{h=1}^N \sum_{t=1}^4 (\mathbf{Propen}_h)^2 \right\} \Sigma^{-1}} \quad \text{and}$$

$$[\mathbf{Variance}]^{-1} = [\mathbf{100I}]^{-1} + \left\{ \sum_{h=1}^N \sum_{t=1}^4 (\mathbf{Propen}_h)^2 \right\} \Sigma^{-1}$$

In the above expressions  $\mathbf{ZZ}_{ht} = \beta_{ht} - \beta_1 \mathbf{Propen}_h$  and ,

$$\begin{aligned} \beta_{ht} = & \beta_0 + \beta_1 \mathbf{Propen}_h + \beta_2 T_2 + \beta_3 T_3 + \beta_4 T_4 + \beta_5 \mathbf{German}_h + \beta_6 \mathbf{Age}_h + \beta_7 \mathbf{Gender}_h \\ & + \beta_8 \mathbf{PosFB}_h + \beta_9 \mathbf{NegFB}_h + \beta_{10} \mathbf{Memlength}_h \end{aligned}$$

#### 1.14 Data augmentation step

(-----Data augmentation details are provided at the end of this document-----)

|                                                       |   |                                                                                                                                                                  |
|-------------------------------------------------------|---|------------------------------------------------------------------------------------------------------------------------------------------------------------------|
| <p>1.15<br/>1.16<br/>⋮<br/>1.29<br/>1.30<br/>1.31</p> | } | <p>Draw <math>\beta_2</math> thru <math>\beta_{10}</math> similarly as per step 1.13. Every drawing is followed by a data augmentation step as per step 1.14</p> |
|-------------------------------------------------------|---|------------------------------------------------------------------------------------------------------------------------------------------------------------------|

1.32 Draw  $\Sigma$

$\Pi[\Sigma / \dots\dots\dots] \propto \mathbf{MVNormal likelihood} \times \mathbf{InvWishart prior}$

$$[\Sigma]^{-1} \propto \text{Wishart} \left( \left[ \left\{ \sum_{h=1}^N \sum_{t=1}^4 (\mathbf{Outcome}_{ht}^* - \boldsymbol{\beta}_{ht})(\mathbf{Outcome}_{ht}^* - \boldsymbol{\beta}_{ht})^T \right\} + \mathbf{10I} \right]^{-1}, N+10 \right)$$

### 1.33 Data augmentation step

(-----Data augmentation details are provided at the end of this document-----)

→ Go back to Step 1a.1 and keep repeating the MCMC chain till convergence

#### IV Description of the Data Augmentation Step

The Outcome model is as specified in equations 4a thru 6a in the manuscript.

We observe  $\mathbf{Outcome}_{ht} = \begin{pmatrix} Bids_{ht} \\ Listings_{ht} \\ Amnt_{ht} \\ Revenue_{ht} \end{pmatrix}$ .

$\mathbf{Outcome}_{ht}$  is a censored version of the latent vector  $\mathbf{Outcome}_{ht}^* = \begin{pmatrix} Bids_{ht}^* \\ Listings_{ht}^* \\ Amnt_{ht}^* \\ Revenue_{ht}^* \end{pmatrix}$  as described in

the manuscript.

The data augmentation aims to augment the censored data so as to recreate the latent  $\mathbf{Outcome}_{ht}^*$  vector. Subsequently the estimation of the parameters becomes a simple process.

The augmentation step is performed after each updation of a parameter in the MCMC chain. The augmentation step uses the fact that the conditional distribution of any dimension in a multivariate normal is also distributed normal.

The following steps constitute the data augmentation procedure,

**Step 0:** Initialize  $\mathbf{Outcome}_{ht}^*$

(Performed only once at the very beginning of the estimation process)

Set  $\mathbf{Outcome}_{ht}^* = \mathbf{Outcome}_{ht}$  for all  $h, t$

That is, set  $Bids_{ht}^* = Bids_{ht}$ ,  $Listings_{ht}^* = Listings_{ht}$ ,  $Amnt_{ht}^* = Amnt_{ht}$ , and  $Revenue_{ht}^* = Revenue_{ht}$

The following four Steps (which update the **Outcome**<sub>ht</sub><sup>\*</sup> vector) are the augmentation steps that are performed regularly during the MCMC chain for all  $h, t$

**Step 1:** Update  $Bids_{ht}^*$

**if**  $Bids_{ht}^* > 0$  then let  $Bids_{ht}^* = Bids_{ht}^*$

**else if**  $Bids_{ht}^* \leq 0$  draw a value between  $-\infty$  and 0 from the following univariate normal distribution and set  $Bids_{ht}^* = \text{the drawn value}$

$$f(Bids_{ht}^* / ..) = \text{Normal}(\text{mean}, \text{variance})$$

where

$$\text{mean} = \beta_{ht}^{(1)} + \begin{bmatrix} \Sigma_{12} & \Sigma_{13} & \Sigma_{14} \end{bmatrix} \begin{bmatrix} \Sigma_{22} & \Sigma_{23} & \Sigma_{24} \\ \Sigma_{32} & \Sigma_{33} & \Sigma_{34} \\ \Sigma_{42} & \Sigma_{43} & \Sigma_{44} \end{bmatrix}^{-1} \begin{bmatrix} Listings_{ht}^* - \beta_{ht}^{(2)} \\ Amnt_{ht}^* - \beta_{ht}^{(3)} \\ Revenue_{ht}^* - \beta_{ht}^{(4)} \end{bmatrix}$$

$$\text{variance} = \Sigma_{11} - \begin{bmatrix} \Sigma_{12} & \Sigma_{13} & \Sigma_{14} \end{bmatrix} \begin{bmatrix} \Sigma_{22} & \Sigma_{23} & \Sigma_{24} \\ \Sigma_{32} & \Sigma_{33} & \Sigma_{34} \\ \Sigma_{42} & \Sigma_{43} & \Sigma_{44} \end{bmatrix}^{-1} \begin{bmatrix} \Sigma_{21} \\ \Sigma_{31} \\ \Sigma_{41} \end{bmatrix}$$

Please note that  $\beta_{ht}^{(1)}, \beta_{ht}^{(2)}, \beta_{ht}^{(3)}, \beta_{ht}^{(4)}$  are the four elements of the  $\beta_{ht}$  vector.

Similarly  $\Sigma_{11}, \Sigma_{12}, \dots, \Sigma_{43}, \Sigma_{44}$  are the individual elements of the 4x4 variance covariance matrix  $\Sigma$

**Step 2:** Update  $Listings_{ht}^*$

**if**  $Listings_{ht}^* > 0$  then let  $Listings_{ht}^* = Listings_{ht}^*$

**else if**  $Listings_{ht}^* \leq 0$  draw a value between  $-\infty$  and 0 from the following univariate normal distribution and set  $Listings_{ht}^* = \text{the drawn value}$

$$f(Listings_{ht}^* / ..) = \text{Normal}(\text{mean}, \text{variance})$$

where

$$mean = \beta_{ht}^{(2)} + \begin{bmatrix} \Sigma_{21} & \Sigma_{23} & \Sigma_{24} \end{bmatrix} \begin{bmatrix} \Sigma_{11} & \Sigma_{13} & \Sigma_{14} \\ \Sigma_{31} & \Sigma_{33} & \Sigma_{34} \\ \Sigma_{41} & \Sigma_{43} & \Sigma_{44} \end{bmatrix}^{-1} \begin{bmatrix} Bids_{ht}^* - \beta_{ht}^{(1)} \\ Amnt_{ht}^* - \beta_{ht}^{(3)} \\ Revenue_{ht}^* - \beta_{ht}^{(4)} \end{bmatrix}$$

$$variance = \Sigma_{22} - \begin{bmatrix} \Sigma_{21} & \Sigma_{23} & \Sigma_{24} \end{bmatrix} \begin{bmatrix} \Sigma_{11} & \Sigma_{13} & \Sigma_{14} \\ \Sigma_{31} & \Sigma_{33} & \Sigma_{34} \\ \Sigma_{41} & \Sigma_{43} & \Sigma_{44} \end{bmatrix}^{-1} \begin{bmatrix} \Sigma_{12} \\ \Sigma_{32} \\ \Sigma_{42} \end{bmatrix}$$

**Step 3:** Update  $Amnt_{ht}^*$

**if**  $Amnt_{ht}^* > 0$  then let  $Amnt_{ht}^* = Amnt_{ht}^*$

**else if**  $Amnt_{ht}^* \leq 0$  draw a value between  $-\infty$  and 0 from the following univariate normal distribution and set  $Amnt_{ht}^* = \text{the drawn value}$

$$f(Amnt_{ht}^* / ..) = \text{Normal}(mean, variance)$$

where

$$mean = \beta_{ht}^{(3)} + \begin{bmatrix} \Sigma_{31} & \Sigma_{32} & \Sigma_{34} \end{bmatrix} \begin{bmatrix} \Sigma_{11} & \Sigma_{12} & \Sigma_{14} \\ \Sigma_{21} & \Sigma_{22} & \Sigma_{24} \\ \Sigma_{41} & \Sigma_{42} & \Sigma_{44} \end{bmatrix}^{-1} \begin{bmatrix} Bids_{ht}^* - \beta_{ht}^{(1)} \\ Listings_{ht}^* - \beta_{ht}^{(2)} \\ Revenue_{ht}^* - \beta_{ht}^{(4)} \end{bmatrix}$$

$$variance = \Sigma_{33} - \begin{bmatrix} \Sigma_{31} & \Sigma_{32} & \Sigma_{34} \end{bmatrix} \begin{bmatrix} \Sigma_{11} & \Sigma_{12} & \Sigma_{14} \\ \Sigma_{21} & \Sigma_{22} & \Sigma_{24} \\ \Sigma_{41} & \Sigma_{42} & \Sigma_{44} \end{bmatrix}^{-1} \begin{bmatrix} \Sigma_{13} \\ \Sigma_{23} \\ \Sigma_{43} \end{bmatrix}$$

**Step 4:** Update  $Revenue_{ht}^*$

**if**  $Revenue_{ht}^* > 0$  then let  $Revenue_{ht}^* = Revenue_{ht}^*$

**else if**  $Revenue_{ht}^* \leq 0$  draw a value between  $-\infty$  and 0 from the following univariate normal distribution and set  $Revenue_{ht}^* = \text{the drawn value}$

$f(\text{Revenue}_{ht}^* / ..) = \text{Normal}(\text{mean}, \text{variance})$

where

$$\text{mean} = \beta_{ht}^{(4)} + \begin{bmatrix} \Sigma_{41} & \Sigma_{42} & \Sigma_{43} \end{bmatrix} \begin{bmatrix} \Sigma_{11} & \Sigma_{12} & \Sigma_{13} \\ \Sigma_{21} & \Sigma_{22} & \Sigma_{23} \\ \Sigma_{31} & \Sigma_{32} & \Sigma_{33} \end{bmatrix}^{-1} \begin{bmatrix} \text{Bids}_{ht}^* - \beta_{ht}^{(1)} \\ \text{Listings}_{ht}^* - \beta_{ht}^{(2)} \\ \text{Amnt}_{ht}^* - \beta_{ht}^{(3)} \end{bmatrix}$$

$$\text{variance} = \Sigma_{44} - \begin{bmatrix} \Sigma_{41} & \Sigma_{42} & \Sigma_{43} \end{bmatrix} \begin{bmatrix} \Sigma_{11} & \Sigma_{12} & \Sigma_{13} \\ \Sigma_{21} & \Sigma_{22} & \Sigma_{23} \\ \Sigma_{31} & \Sigma_{32} & \Sigma_{33} \end{bmatrix}^{-1} \begin{bmatrix} \Sigma_{14} \\ \Sigma_{24} \\ \Sigma_{34} \end{bmatrix}$$

Once again please note that  $\beta_{ht}^{(1)}, \beta_{ht}^{(2)}, \beta_{ht}^{(3)}, \beta_{ht}^{(4)}$  are the four elements of the  $\beta_{ht}$  vector.

Similarly  $\Sigma_{11}, \Sigma_{12}, \dots, \Sigma_{43}, \Sigma_{44}$  are the individual elements of the 4x4 variance covariance matrix  $\Sigma$

\*\*\*
